# Supplementary material for: Progerin reduces LAP2α-telomere association in Hutchinson-Gilford progeria
Source: eLife journal article supplement (doi:10.7554/elife.07759), 2015-08-27
Supplement: supp [file elife_poa_e07759_Figure_3_figure_supplement_1.pdf › elife_poa_e07759_Figure_3_figure_supplement_1.pdf]

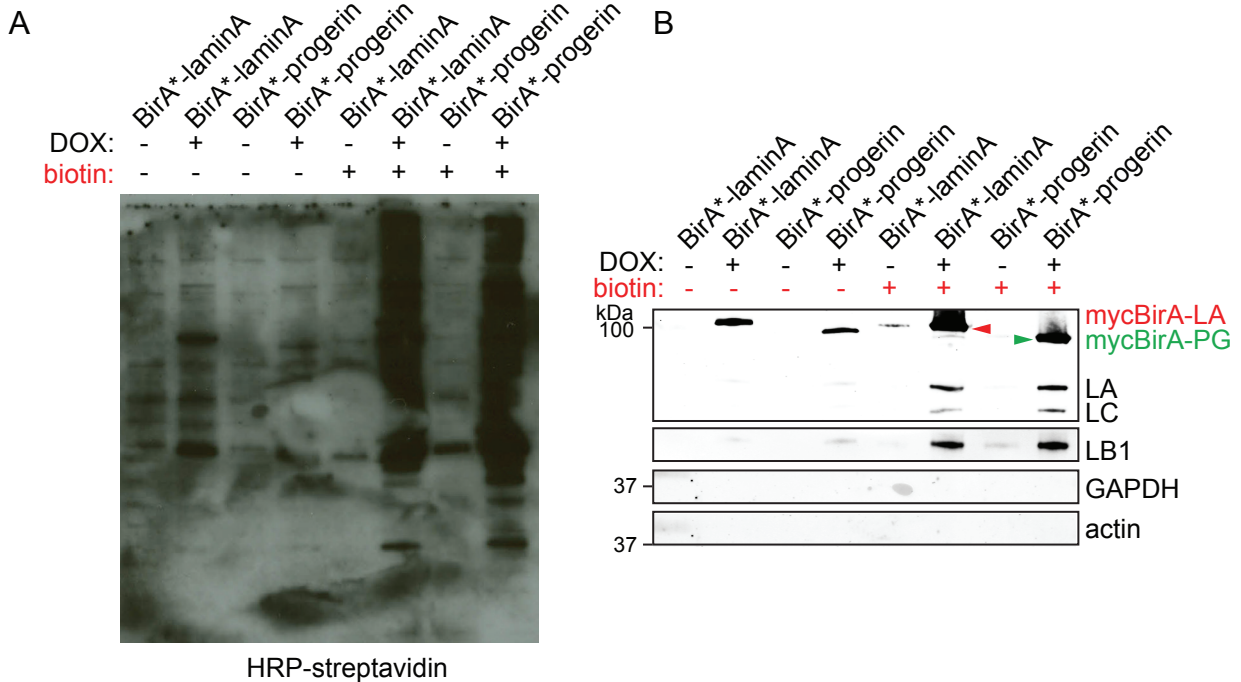

**C**

Exponentially Modified Protein Abundance Index (emPAI)

|          | construct      |               |                | p      |
|----------|----------------|---------------|----------------|--------|
|          | BirA*-progerin | BirA*-lamin A | BirA*-progerin |        |
| DOX      | -              | +             | +              |        |
| Biotin   | +              | +             | +              |        |
| LMNA     | 7.72 ± 1.07    | 311.51 ± 97   | 237.1 ± 75.3   | ns     |
| LAP2     | 2.01 ± 0.11    | 7.42 ± 0.28   | 3.22 ± 0.24    | <0.001 |
| EMD      | 0 ± 0          | 1.3 ± 0.27    | 0.6 ± 0.09     | <0.05  |
| LMNB1    | 0.33 ± 0.17    | 1.29 ± 0.32   | 1.74 ± 0.09    | ns     |
| LMNB2    | 0.39 ± 0.2     | 1.07 ± 0.15   | 1.45 ± 0.04    | ns     |
| AHNAK    | 0.02 ± 0.01    | 1.14 ± 0.55   | 0.57 ± 0.17    | ns     |
| HP1BP3   | 0 ± 0          | 0.39 ± 0.2    | 0.12 ± 0.06    | ns     |
| TPR      | 0 ± 0          | 0.28 ± 0.1    | 0.04 ± 0.02    | ns     |
| HIST1H1B | 2.03 ± 1.02    | 2.18 ± 0.94   | 2.48 ± 1.24    | ns     |
| HIST1H1C | 1.78 ± 0.89    | 2.12 ± 0.72   | 2.22 ± 1.11    | ns     |
| DDB1     | 0.1 ± 0.05     | 0.1 ± 0.05    | 0.1 ± 0.05     | ns     |
