# Supplementary figures and images for: Progerin reduces LAP2α-telomere association in Hutchinson-Gilford progeria
Source: eLife journal article supplement (doi:10.7554/elife.07759), 2015-08-27

A

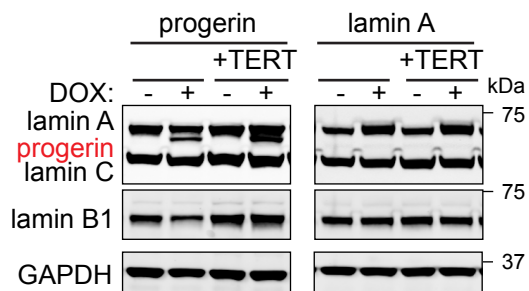

B

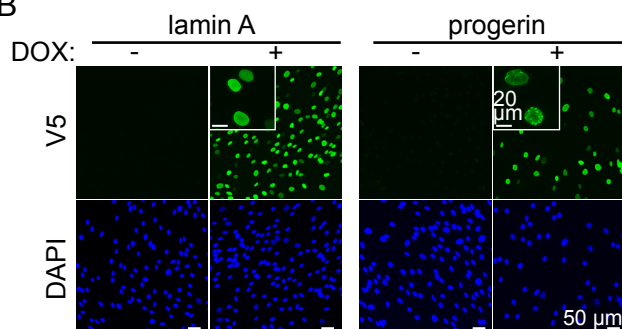

C

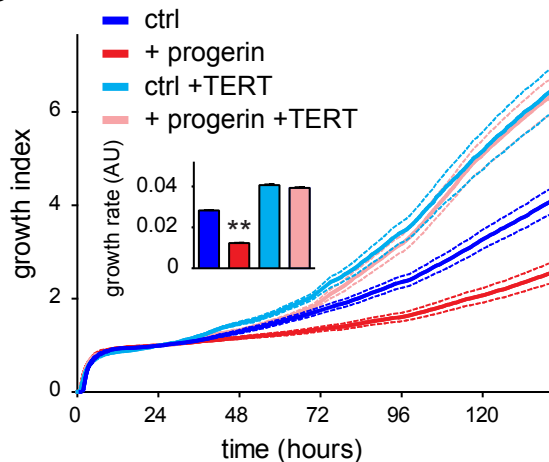

D

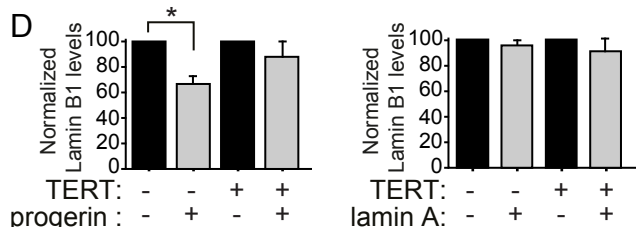

E

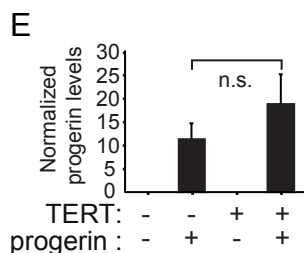

F

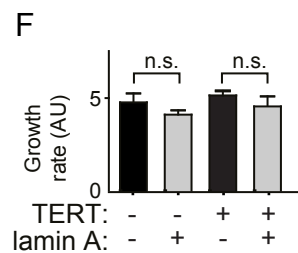

G

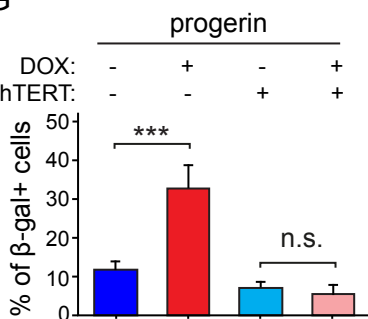

H

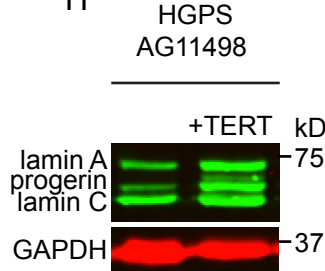

I

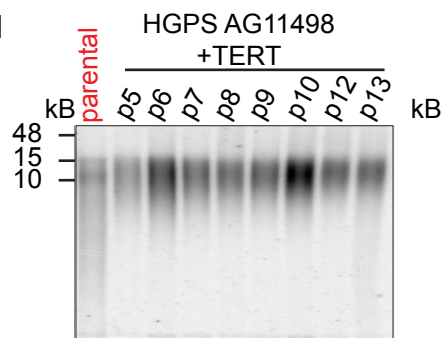

J

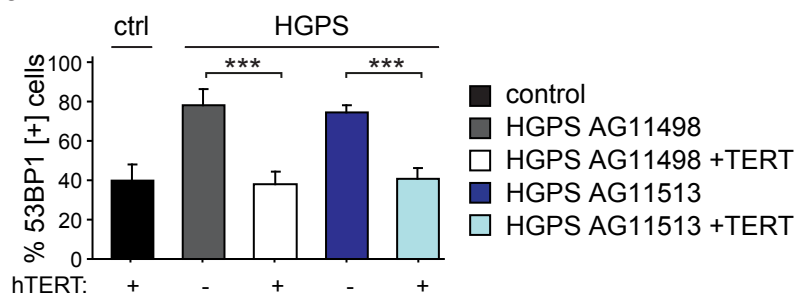

K

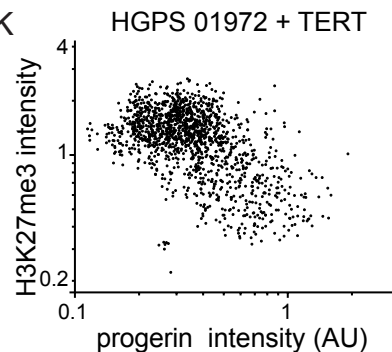

Supplement: supp [file elife_poa_e07759_Figure_1_figure_supplement_1.pdf › elife_poa_e07759_Figure_1_figure_supplement_1.pdf]

Dreesen\_Figure 1 - figure supplement 2

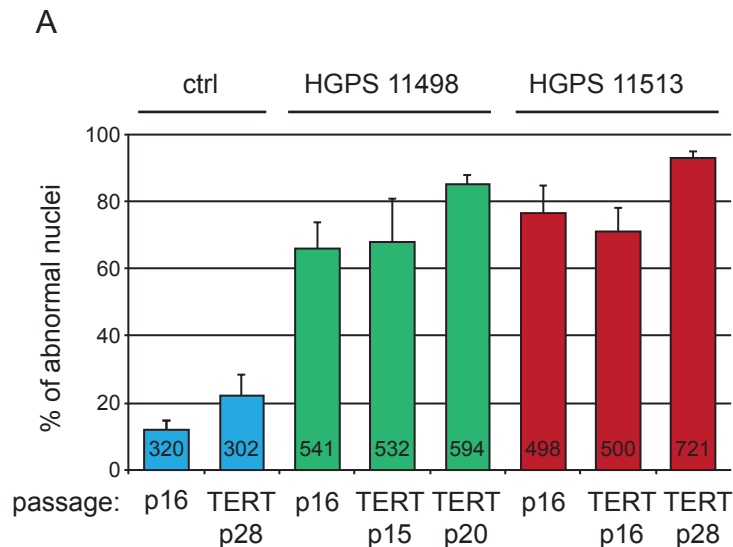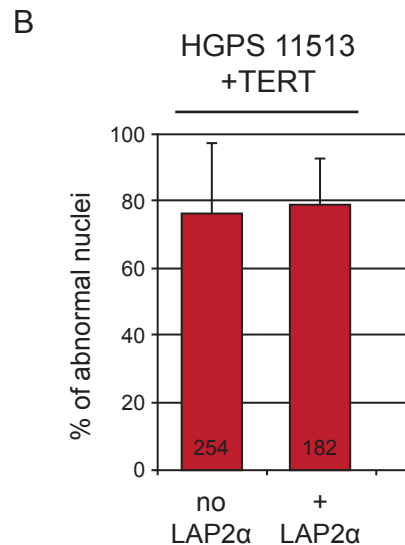

Supplement: supp [file elife_poa_e07759_Figure_1_figure_supplement_2.pdf › elife_poa_e07759_Figure_1_figure_supplement_2.pdf]

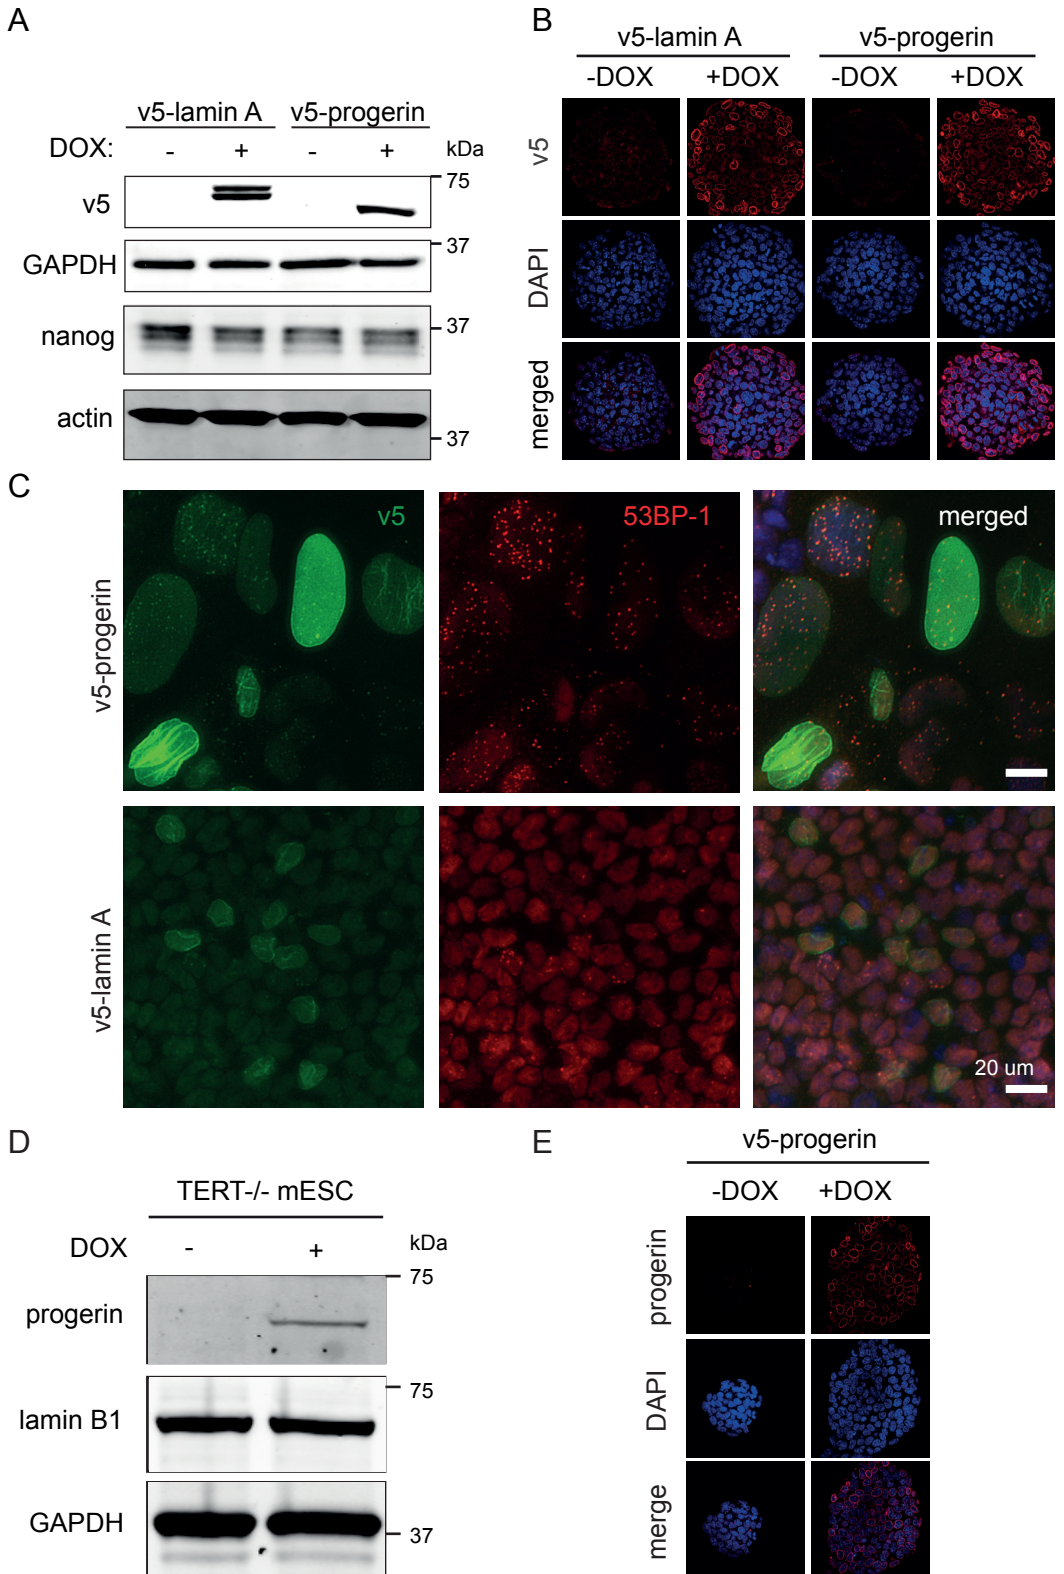

Supplement: supp [file elife_poa_e07759_Figure_2_figure_supplement_1.pdf › elife_poa_e07759_Figure_2_figure_supplement_1.pdf]

A

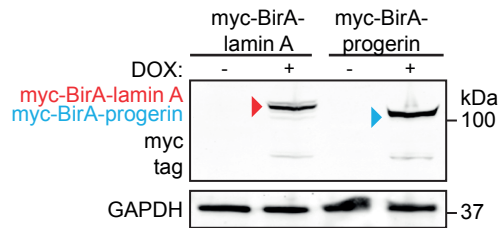

B

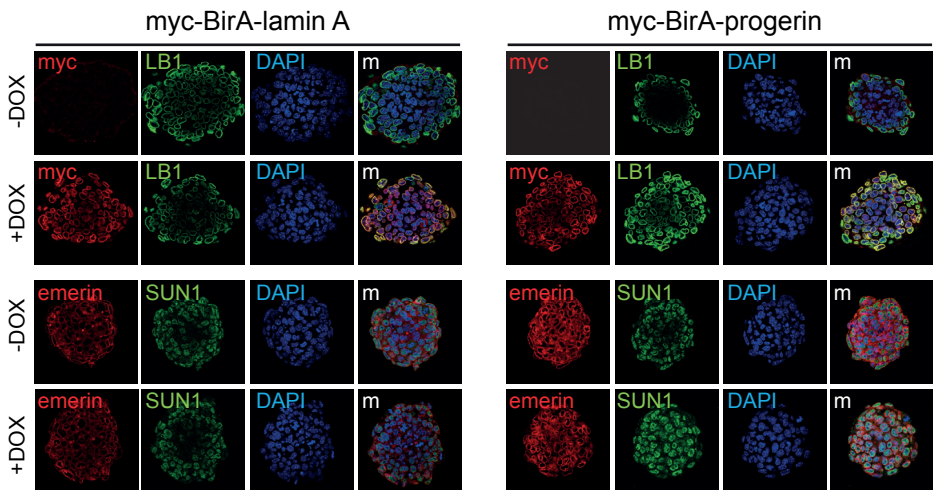

C

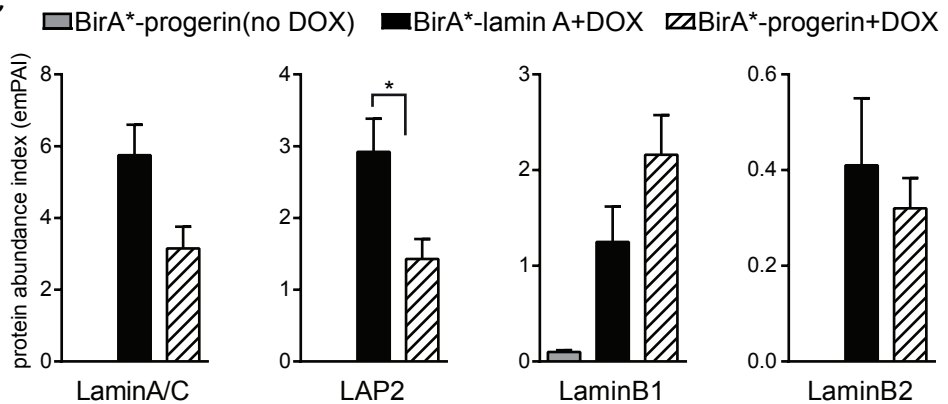

Supplement: supp [file elife_poa_e07759_Figure_3_figure_supplement_2.pdf › elife_poa_e07759_Figure_3_figure_supplement_2.pdf]

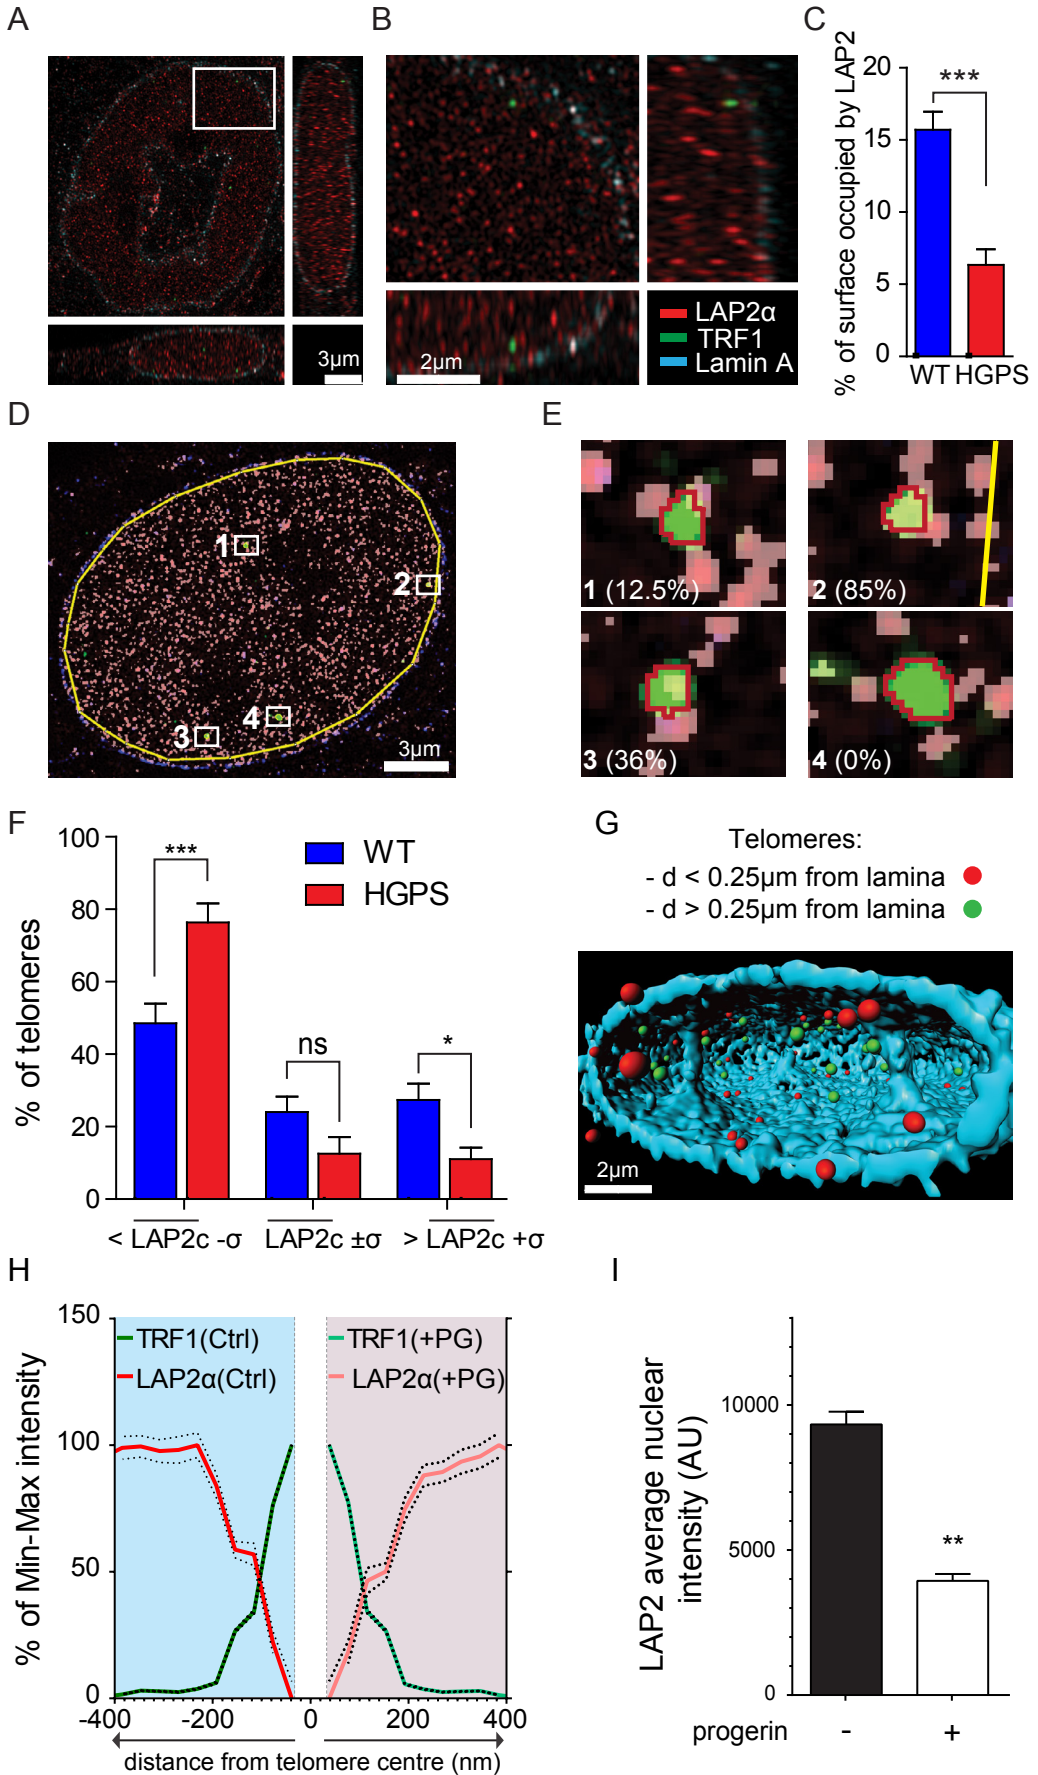

Supplement: supp [file elife_poa_e07759_Figure_4_figure_supplement_1.pdf › elife_poa_e07759_Figure_4_figure_supplement_1.pdf]

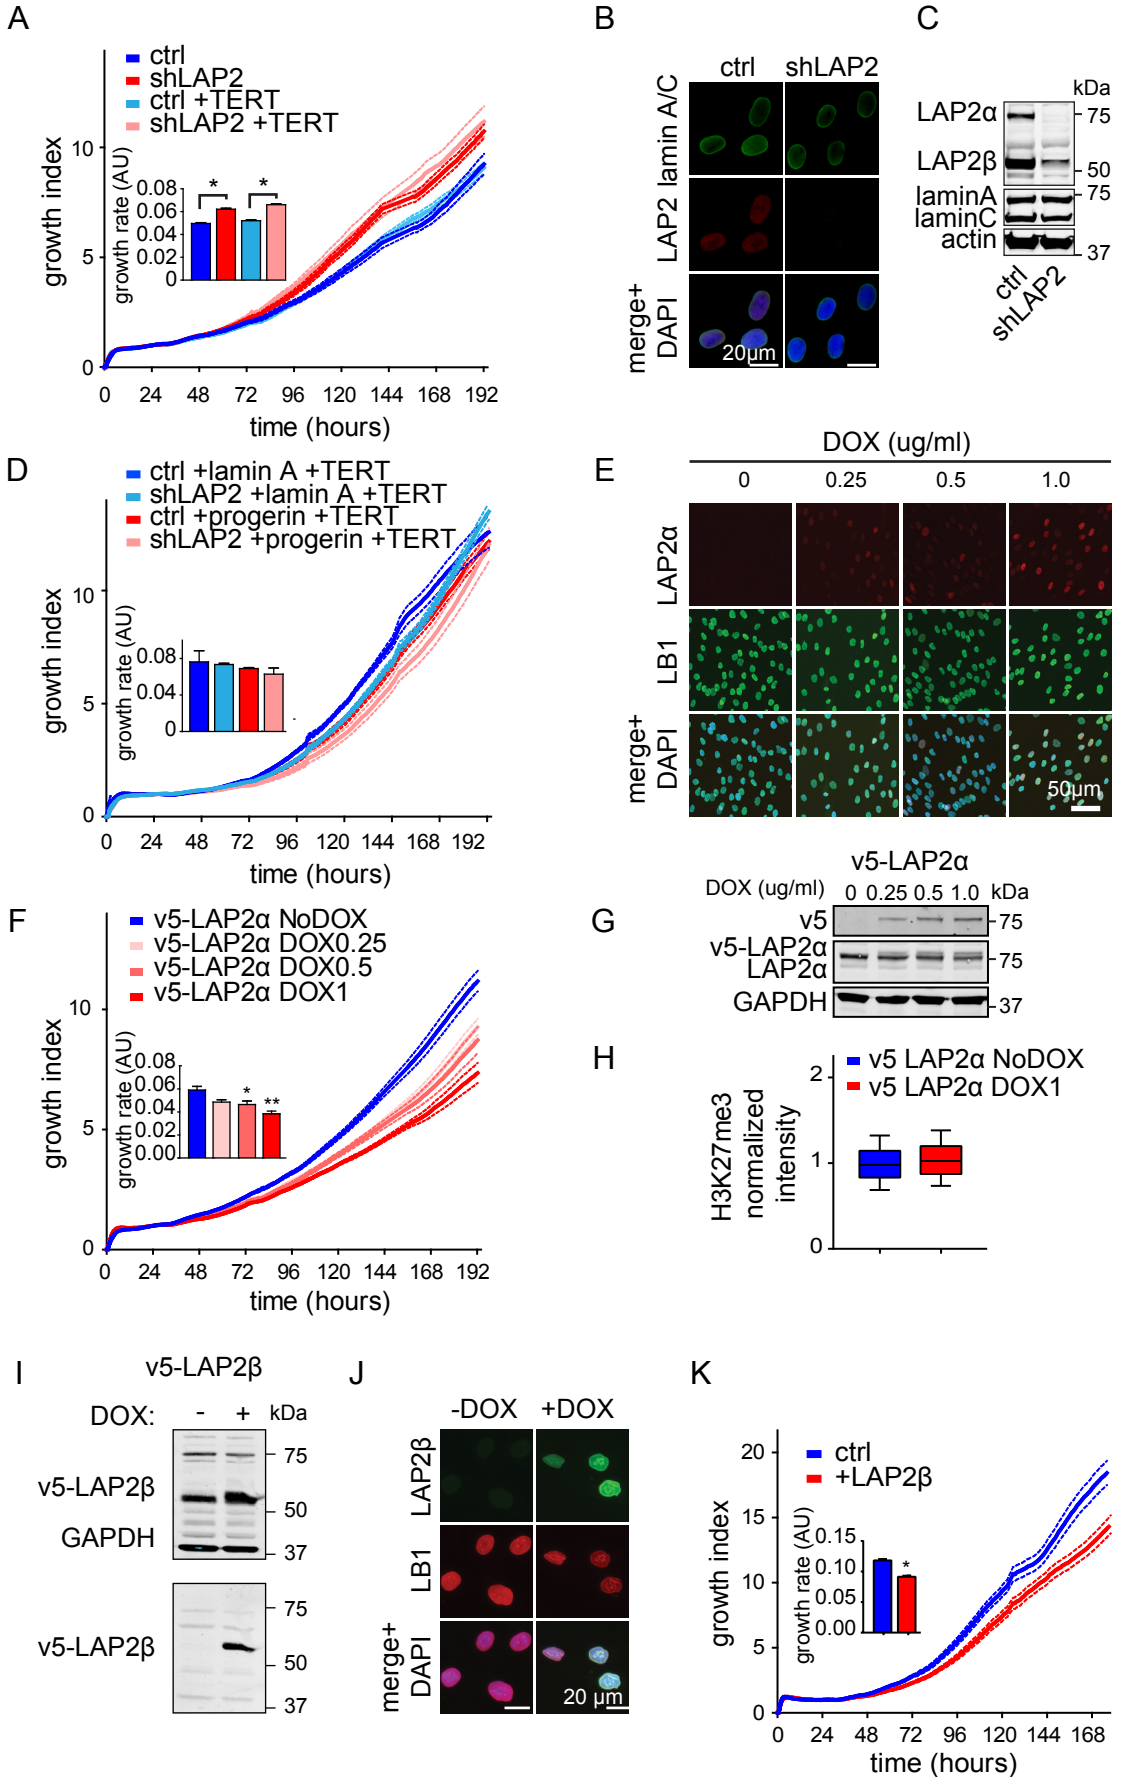

Supplement: supp [file elife_poa_e07759_Figure_5_figure_supplement_1.pdf › elife_poa_e07759_Figure_5_figure_supplement_1.pdf]

A

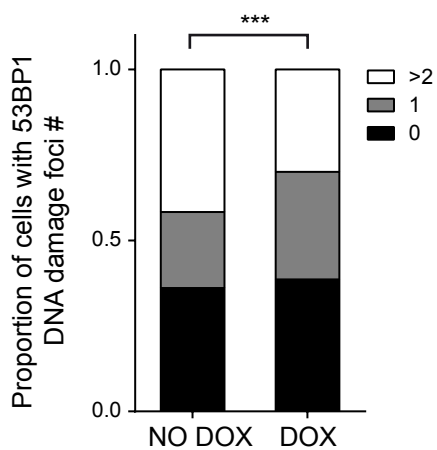

B

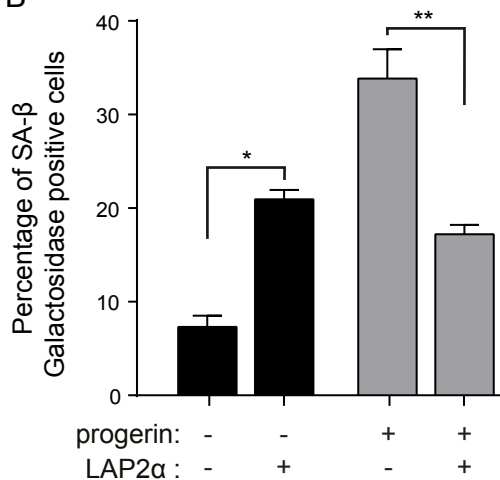

C

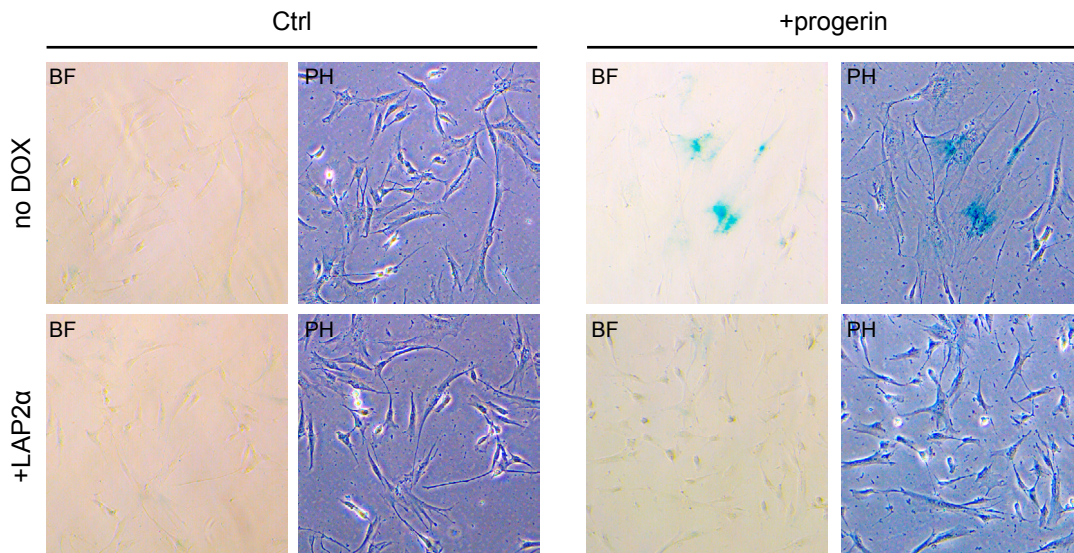

Supplement: supp [file elife_poa_e07759_Figure_5_figure_supplement_2.pdf › elife_poa_e07759_Figure_5_figure_supplement_2.pdf]

Dreesen\_Figure 5 - figure supplement 3

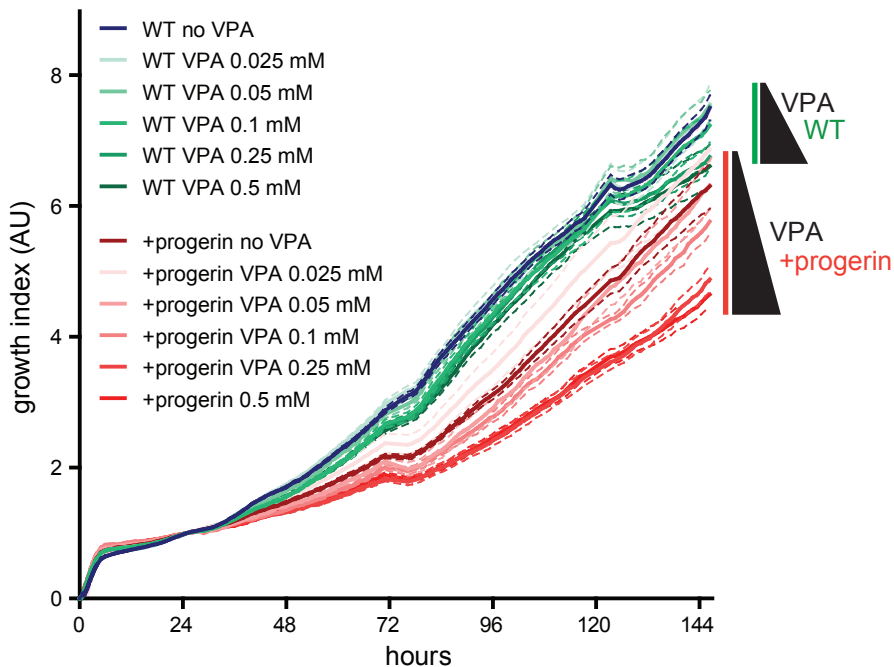

Supplement: supp [file elife_poa_e07759_Figure_5_figure_supplement_3.pdf › elife_poa_e07759_Figure_5_figure_supplement_3.pdf]
